# Supplementary material for: Construction and Destruction of Bontău Composite Volcano in the Extensional Setting of Zărand Basin during Miocene (Apuseni Mts., Romania)
Source: MDPI journal article supplement (doi:10.3390/min12020243), 2022-02-14
Supplement: s1 [file s1]

Archive with 2 entries (2 files):
- minerals-1572063- Figures S1 and S2.pdf
- Supplementary Tables S1 and S2.xls
