# Supplementary material for: Construction and Destruction of Bontău Composite Volcano in the Extensional Setting of Zărand Basin during Miocene (Apuseni Mts., Romania)
Source: MDPI journal article supplement (doi:10.3390/min12020243), 2022-02-14
Supplement: s1 [file s1 › Supplementary Tables S1 and S2.xls]

## Sheet: Supp table S1
Supplementary table S1: New geochemical and isotopic data
	1	2	3	4	5	6	7	8	9	10	11	12	13	14	15	16	17	18	19	20	21	22	23	24	25	26	27	28	29	30	31	32	33	34		Other used parameters
Sample	782	781	829A	795	84	775-3A	776	815	784	775-3B	810	775-11	820	806	775-4	812	790	807	777	80	771	792	775-6	793	814	769	785	805	809	819	775-5	811	823	827		Lower crust	Midle crust	Uper crust	Average cust Carpathians	OIB	MORB	E-MORB
Petrography	BA	BA	A px	A px	A px	A px	A px am	A px	A px	A px	A px	A px am	A px	A px	A px	A px	A px	A am px	A px am	A px	A am px	A px	A px	A px	A px	A am px	A px am	A px am	A px	A am px	A px am	A px am	A am px	A am px
Volcanic form	VR	VR	DA	VD	VD	VR	DA	VD	DA	VR	VR	DA	DA	VD	VR	VR	DA	VR	DA	VD	DA	DA	DA	VD	VD	VD	VR	VD	VR	DA	VR	VR	DA	DA
Coordinates
N	46.2542	46.2539	46.2286	46.3138	46.3469	46.2472	46.2616	46.2665	46.2609	46.2472	46.239	46.2591	46.2111	22.5046	46.2477	46.2485	46.2665	46.2291	46.2655	46.3958	46.2228	46.1975	46.2534	46.3052	46.2642	46.2704	46.2617	46.2856	46.2376	46.218	46.2526	46.2413	46.2329	46.2367
E	22.4225	22.4241	22.4739	22.3732	22.2812	22.4321	22.3963	22.5358	22.4242	22.4321	22.5239	22.3992	22.4296	22.5217	22.4224	22.5279	22.4184	22.5241	22.395	22.2908	22.3264	22.5372	22.4134	22.3979	22.5463	22.3674	22.4238	22.5046	22.5231	22.4368	22.4177	22.5257	22.4174	22.3747
(%)
SiO[2]	53.4	53.7	54.7	55.9	56.0	56.7	56.7	56.7	56.9	57	57.3	57.4	57.4	57.6	57.8	57.8	57.9	57.9	58.1	58.3	58.7	58.8	58.9	58.9	58.9	59	59	59.1	59.1	60	60.2	60.6	60.6	60.6		53.4	63.5	66.6	62.8338	44.84	49.1	45.5
Al[2]O[3]	17.65	17.75	17.4	18.25	17.15	17.35	17.45	17.45	16.85	17.35	17.3	17.65	17.25	17.5	17.25	17.4	17.45	17.15	18.05	17.60	18.45	17.6	18	17.85	17.35	17.25	17.8	17.45	17.7	17.65	18	17.6	17.4	17.75		16.9	15	15.4	17.141	13.42	16.4	14.2
Fe[2]O[3]	9.9	9.63	9.09	9.11	8.59	8.64	8.19	8.48	8.31	8.49	7.87	8.13	7.69	7.83	8.02	8.02	8.04	7.47	8.04	7.11	7.96	7.74	7.38	7.6	7.99	6.89	7.5	7.63	7.46	7.29	7.38	6.92	7.47	7.22		8.57	6.02	4.5	7.07042	13.07	8.8	10.3
CaO	8.33	8.18	7.82	8.21	7.62	7.64	7.09	7.83	7.34	7.56	6.87	7.47	7.69	7.52	7.08	7.33	6.75	6.61	7.35	6.99	7.74	7.38	6.85	7.18	7.55	6.66	6.56	7.15	6.47	6.65	6.57	6.62	5.99	6.8		9.59	5.25	3.59	3.45021	10.35	12.4	11.4
MgO	4.46	4.19	4.09	2.81	3.63	3.79	2.81	3.56	3.54	3.73	3.19	2.91	3.82	3.69	3.39	3.29	2.91	2.75	2.59	2.34	2.97	3.54	2.44	1.76	3.38	2.38	3.11	3.33	2.68	2.34	2.88	2.44	1.39	2.21		7.24	3.59	2.48	3.23019	8.94	10.3	9.2
Na[2]O	2.51	2.71	2.87	3.27	2.96	2.91	2.97	3.11	2.74	2.91	3.1	3.05	2.94	2.97	2.96	3.16	2.94	2.99	3.06	3.09	3.2	3.12	3.04	3.38	3.08	3.24	2.72	3.22	2.93	3.23	3.06	3.2	3.05	3.34		2.65	3.39	3.27	2.38014	2.98	1.9	2.3
K[2]O	0.84	0.68	0.87	0.84	0.97	0.94	0.8	1.07	0.9	0.97	1.04	0.85	1.02	1.1	1.02	1.17	1.01	0.99	0.85	1.01	0.86	1.2	1.08	0.74	1.2	0.88	1.12	1.1	1.25	1.04	1.26	1.19	1.11	0.95		0.61	2.3	2.8	2.80017	1.2	0.1	0.5
TiO[2]	0.92	0.91	0.97	0.98	0.82	0.79	0.75	0.84	0.72	0.79	0.73	0.76	0.74	0.77	0.75	0.82	0.75	0.69	0.78	0.72	0.79	0.75	0.72	0.73	0.73	0.61	0.74	0.72	0.71	0.71	0.7	0.65	0.67	0.67		0.82	0.69	0.64	0.84005	3.09	0.6	1.5
MnO	0.17	0.16	0.14	0.1	0.82	0.16	0.13	0.15	0.21	0.16	0.15	0.14	0.13	0.15	0.15	0.15	0.2	0.15	0.11	0.72	0.15	0.14	0.15	0.12	0.14	0.14	0.14	0.15	0.15	0.12	0.15	0.15	0.09	0.15		0.1	0.1	0.1	0.109007	0.18	0	0
P[2]O[5]	0.28	0.28	0.27	0.24	0.22	0.23	0.25	0.23	0.18	0.22	0.2	0.23	0.24	0.21	0.22	0.22	0.2	0.21	0.24	0.22	0.21	0.22	0.2	0.2	0.23	0.19	0.21	0.21	0.17	0.22	0.21	0.18	0.21	0.22		0.1	0.15	0.15	0.145009	0.67	0.51	0.55
Total	99.31	99.64	99.79	101.05	99.10	99.42	99.17	100.08	100.34	99.47	98.35	99.81	99.87	100.24	99.54	100.2	100.32	98.23	101.92	99.16	101.69	100.74	99.87	99.98	101.5	98.4	101.54	100.43	100.35	100.71	101.35	100.45	101.32	100.97		100.05	100	100	100	98.84	0	95.45
LOI	0.79	1.39	1.52	1.3	1.57	0.22	1.98	0.6	2.57	0.23	0.55	1.17	0.88	0.85	0.84	0.79	2.12	1.27	2.71	2.1	0.61	0.19	1.07	1.49	0.89	1.12	2.59	0.32	1.68	1.41	0.89	0.85	3.29	1.02					0
Mg#	44.5306	43.6729	44.4999	35.4697	42.9563	43.8734	37.9423	42.7951	43.1533	43.9117	41.9384	38.9438	46.9553	45.646	42.9626	42.2305	39.2088	39.6143	36.4696	36.9673	39.936	44.9042	37.074	29.2122	42.9821	38.1016	42.4935	43.7483	39.0311	36.3867	41.0173	38.5875	24.9018	35.2943		71.9089	51.5195	49.5479	0	54.9326	67.5929	62
(ppm)
Ni	11	10.7	10.5	13	10.9	8.8	8.7	9.1	21.7	8.9	7.7	8.3	8	11	7.7	8.2	10.4	6.8	8.8	1.1	5.1	10.5	3.5	4.2	10.8	6.1	8.7	9.6	3.4	3.9	12.7	2.2	3.4	3.3		88	33.5	47	48.17	188	149.5	160
Cr	30	30	20	20	20	20	10	20	190	20	10	10	50	20	20	20	20	10	20	10	10	30	10	10	20	10	10	20	10	10	10	10	10	10		215	76	92	115.17	321	0	120
V	297	311	307	256	245	236	191	234	210	219	193	200	210	200	202	206	180	166	211	156	112	207	149	142	199	99	194	177	155	153	161	136	138	89		196	107	97	145.34	277	0	89
Sc	33.7	34.4	31.9	23.2	25.6	24.3	18	26.8	23.2	24.7	17.1	16.4	24.8	21.3	22.1	22.3	17.5	18.2	17.4	13.7	16	21.8	13.6	14.9	21.1	13.1	19.4	18.7	14.6	15.9	16.9	12.6	16.2	12.5		31	19	14	21.34	23.1	41.37	30
Cu	90.3	41.8	47.2	64.7	56.3	117.0	39.0	58.2	32.2	127.5	34.4	35.6	59.5	41.2	39.4	42.5	31.6	33.3	30.9	7.3	16.7	30.3	18.8	16.2	31.0	22.5	42.7	37.3	8.6	20.7	34.8	12.9	17.9	11.0		26	26	28	34.84	62	74.4	68
Zn	94	90	87	99	94	85	88	89	74	85	97	88	86	85	85	87	90	84	88	102	86	81	96	88	81	80	88	85	87	82	85	83	80	81		78	69.5	67	111	115	0	60
Ga	17.8	18.4	18.3	20.1	16.4	19.3	18.7	18.2	18.4	19.8	18.0	20.3	17.0	18.4	18.1	18.2	19.4	17.5	20.1	16.9	16.0	19.1	19.8	19.1	19.1	16.7	19.3	19.3	17.4	18.7	18.2	18.0	18.8	18.9		13	17.5	17.5	0	0	0	0
Pb	3.7	3.8	5	4.5	4.1	4	4.2	7.5	3.8	3.9	4.9	4.4	5.2	5.5	4.1	4.8	4.9	4.7	4.3	8.5	4.9	4.8	4.6	3.6	4.9	4.7	4.7	5.5	5	6.9	4.8	5.7	6.5	5.3		4	15.2	17	12.72	3.2	0.3	0.6
Sr	418	432	359	295	295	394	344	330	279	357	292	348	321	320	324	322	313	278	341	294	264	348	281	247	347	300	314	306	276	300	295	311	283	304		348	282	320	141	660	90	155
Rb	18	14.8	23.9	27.4	27.8	29.1	20.9	31.2	26.7	28.1	28.1	21.3	28.6	35.6	28.5	33.6	28.2	25.6	22.2	31.5	15.7	37.1	30.9	26.5	36.5	38.6	39.4	32.2	29.6	32.4	36.5	37.3	31.6	26		11	65	84	93.22	31	0.56	5.04
Ba	141.5	143.5	205	141.5	170.0	213	154.5	220	287	205	221	145.0	199.0	255	220	250	226	213	151.5	196.5	149.5	280	193.0	136.0	254	227	232	233	203	242	306	234	228	183.5		259	532	628	605	350	6.3	57
Zr	72	74	87	104	105	98	96	102	89	92	115	96	95	110	93	112	118	95	94	119	86	120	134	120	108	112	101	113	116	106	108	125	108	111		68	149	193	174	280	74	73
Nb	3.7	3.9	3.6	3.5	5.3	4.8	3.3	4.5	4	4.2	4.9	3.1	4.4	4.5	4.4	4.9	4.4	4.4	3.1	5.3	2.9	5.2	5	3.5	5.1	3.9	4.9	4.7	4.2	5.5	5.4	4.2	4.6	3.8		5	10	12	12.02	48	2.33	8.3
Th	1.93	1.92	2.59	2.37	3.69	3.06	2.59	3.67	2.97	2.97	3.70	2.75	3.69	4.03	3.53	3.87	3.99	3.74	2.89	3.32	2.61	4.11	4.01	2.42	4.57	3.57	3.65	4.01	4.17	3.38	4.13	4.58	3.84	3.63		1.2	6.5	10.5	9.27	4	0.12	0.6
Y	19.4	20.2	22.4	24.8	24.6	21.7	21.9	22.2	20.1	20.6	24.9	22.0	19.5	21.9	21.6	21.7	21.0	17.5	19.8	25.6	18.2	23.6	25.1	24.4	21.3	18.9	19.4	21.7	20.4	19.9	18.4	21.8	19.3	22.0		16	20	21	30.07	29	28	22
La	8.7	8.9	11.3	9.6	11.0	12.4	10.2	12.5	10.6	12.1	13.4	9.9	12.0	13.6	14.3	13.9	13.2	11.1	9.5	11.5	9.4	14.9	13.4	9.6	15.0	13.8	12.8	13.5	12.2	13.3	15.5	14.9	14.2	12.3		8	24	31	26.67	37	2.5	6.3
Ce	20.1	19.7	21.7	21.0	24.8	24.9	21.8	26.1	20.6	23.3	27.9	19.2	23.5	27.6	24.4	27.5	26.6	22.8	21.0	26.6	20.0	30.5	26.5	21.7	29.2	28.6	25.1	27.8	26.9	26.0	29.7	29.9	26.0	25.1		20	53	63	56.67	80	7.5	15
Pr	2.82	2.71	3.31	2.87	3.26	3.66	3.14	3.65	2.81	3.38	3.86	2.74	3.12	3.61	3.57	3.76	3.42	3.16	2.87	3.51	2.68	4.08	3.66	3.17	3.80	3.86	3.48	3.61	3.44	3.45	3.98	3.89	3.72	3.37		2.4	5.8	7.1	0	9.7	1.32	2.05
Nd	12.5	12.7	14.2	14.0	13.7	15.0	13.3	14.9	12.2	14.8	16.4	11.8	13.5	15.7	14.8	16.4	13.7	12.6	12.6	15.0	10.8	17.4	15.8	13.6	16.0	16.5	14.0	15.5	14.0	14.9	15.5	16.0	15.4	14.5		11	25	27	26	38.5	7.3	9
Sm	3.07	2.66	3.30	3.57	3.33	3.28	3.32	3.75	2.64	3.05	4.19	3.08	3.13	3.07	3.13	3.46	3.29	2.53	3.15	3.74	2.55	3.84	3.88	3.56	3.39	3.45	3.35	3.57	3.11	3.22	3.58	3.52	3.25	3.59		2.8	4.6	4.7	0	10	2.63	2.6
Eu	1.12	1.10	1.17	1.11	1.07	1.09	1.03	1.19	0.95	1.06	1.21	1.06	0.96	1.08	1.09	1.04	1.19	0.94	0.96	1.19	0.92	0.95	1.17	1.07	1.07	1.09	0.94	1.04	0.94	1.04	1.22	1.09	1.05	1.09		1.1	1.4	1	0	3	1.02	0.91
Gd	3.87	3.44	3.98	3.87	3.83	3.38	3.75	3.44	2.99	3.29	4.22	3.40	3.34	3.33	3.49	3.60	3.37	3.01	3.51	4.14	2.85	3.56	4.13	3.99	3.60	3.74	3.58	3.39	3.65	3.52	3.93	3.58	3.60	3.61		3.1	4	4	0	7.62	3.68	2.97
Tb	0.60	0.54	0.67	0.62	0.67	0.51	0.56	0.61	0.52	0.55	0.67	0.54	0.58	0.57	0.64	0.56	0.57	0.52	0.59	0.69	0.45	0.56	0.63	0.66	0.55	0.56	0.56	0.54	0.54	0.53	0.58	0.58	0.53	0.58		0.48	0.7	0.7	0	1.05	0.67	0.53
Dy	3.73	3.61	4.16	4.29	4.35	3.59	3.74	3.90	3.37	3.77	4.48	3.68	3.66	3.67	3.92	3.78	3.62	2.91	3.60	4.56	2.86	3.88	4.10	4.10	3.63	3.76	3.66	3.63	3.77	3.64	3.35	3.77	3.50	3.71		3.1	3.8	3.9	0	5.6	4.55	3.55
Ho	0.78	0.78	0.85	0.90	0.90	0.76	0.79	0.77	0.77	0.74	0.96	0.70	0.75	0.80	0.83	0.79	0.73	0.65	0.76	0.96	0.59	0.80	0.88	0.90	0.76	0.70	0.70	0.79	0.80	0.77	0.77	0.78	0.65	0.76		0.68	0.82	0.83	0	1.06	1.01	0.79
Er	2.25	2.30	2.33	2.53	2.78	2.00	2.44	2.31	2.23	2.12	2.56	2.21	2.09	2.24	2.23	2.27	2.28	1.96	2.15	2.95	1.75	2.12	2.45	2.36	2.17	2.16	2.17	2.20	2.51	2.36	2.12	2.38	1.99	2.40		1.9	2.3	2.3	0	2.62	2.97	2.31
Tm	0.31	0.33	0.40	0.42	0.40	0.35	0.35	0.38	0.37	0.38	0.44	0.38	0.36	0.40	0.38	0.41	0.37	0.35	0.37	0.44	0.27	0.37	0.45	0.42	0.36	0.35	0.35	0.35	0.38	0.32	0.36	0.36	0.33	0.40		0.24	0.32	0.3	0	0.35	0.456	0.356
Yb	2.08	2.17	2.39	2.31	2.63	2.08	2.27	2.13	2.34	2.15	2.68	2.35	2.24	2.35	2.33	2.10	2.13	1.88	2.56	2.79	1.83	2.16	2.64	2.61	2.05	1.98	2.25	2.55	2.04	2.05	2.25	2.44	1.97	2.59		1.5	2.2	2	0	2.16	3.05	2.37
Lu	0.34	0.30	0.36	0.39	0.40	0.32	0.36	0.36	0.39	0.35	0.43	0.35	0.36	0.38	0.36	0.30	0.38	0.31	0.36	0.44	0.29	0.34	0.42	0.42	0.33	0.36	0.32	0.40	0.37	0.33	0.33	0.37	0.37	0.37		0.25	0.4	0.31	0	0.3	0.455	0.354
Hf	2.1	2.4	2.6	2.7	3.0	2.2	2.6	2.7	2.5	2.2	3.1	2.4	2.7	3.1	2.7	2.9	2.8	2.7	2.6	3.2	2.2	2.8	3.1	3.1	3	3.74	2.8	3	3.2	2.5	3	3	2.9	3		1.9	4.4	5.3	0	7.8	2.05	2.03
Ta	0.2	0.1	0.1	0.1	0.4	0.1	0.1	0.1	0.2	0.1	0.1	0.1	0.1	0.1	0.2	0.1	0.1	0.1	0.1	0.4	0.1	0.1	0.1	0.1	0.1	0.2	0.1	0.2	0.1	0.1	0.3	0.1	0.1	0.1		0.6	0.6	0.9	0	2.7	0.132	0.47
Co	23.8	23.3	22	20.6	22.4	18.8	16.4	19.7	17.7	19.2	16.3	15.8	16.1	16	16.9	17.8	15.9	18.5	16.6	12.5	13.3	11	12.2	12.8	10.8	11.9	15.9	16.4	13.9	13.1	14.9	11.9	10.3	11.3		38	22	17.3	0	0	0	0
U	0.62	0.62	0.94	0.70	1.11	0.97	0.76	1.19	1.09	0.97	1.19	0.83	1.45	1.25	1.03	1.24	1.12	1.16	0.82	0.83	0.55	1.32	1.14	0.66	1.37	0.84	1.21	1.29	1.23	1.11	1.25	1.22	1.26	1.02		0.2	1.3	2.7	0	1.02	0.047	0.18
{87}Sr/{86}Sr	0.704393		0.70466	0.704434			0.704425			0.704712							0.704967	0.705124					0.705177						0.705037	0.705559			0.70543	0.704707		0.704			0.720792	0.7037	0.7031	0.7033
{143}Nd/{144}Nd	0.512716		0.512666	0.512712			0.512778			0.512693							0.512727	0.512666					0.512705						0.512694	0.512586			0.512648	0.512746					0.512113	0.51285	0.513	0.51298
eNd	0.152095		0.0545698	0.144459			0.273127			0.107147							0.174241	0.0545042					0.129873						0.109157	-0.102287			0.0200496	0.211245						4.13547	7.06151	6.67137
Rb/Sr	0.0430622	0.0342593	0.0665738	0.0928814	0.0942373	0.0738579	0.0607558	0.0945455	0.0956989	0.0787115	0.0962329	0.0612069	0.0890966	0.11125	0.087963	0.104348	0.0900958	0.0920863	0.0651026	0.107143	0.0594697	0.106609	0.109964	0.107287	0.105187	0.128667	0.125478	0.105229	0.107246	0.108	0.123729	0.119936	0.111661	0.0855263		0.230496	0.2625	0.2625	0	0.0469697	0.00622222	0.0325161
Sr/Y	21.5464	21.3861	16.0268	11.8952	11.9919	18.1567	15.7078	14.8649	13.8806	17.3301	11.7269	15.8182	16.4615	14.6119	15	14.8387	14.9048	15.8857	17.2222	11.4844	14.5055	14.7458	11.1952	10.123	16.2911	15.873	16.1856	14.1014	13.5294	15.0754	16.0326	14.2661	14.6632	13.8182		14.1	15.2381	15.2381		22.7586	3.21429	7.04545
Dyn	14.685	14.2126	16.378	16.8898	17.126	14.1339	14.7244	15.3543	13.2677	14.8425	17.6378	14.4882	14.4094	14.4488	15.4331	14.8819	14.252	11.4567	14.1732	17.9528	11.2598	15.2756	16.1417	16.1417	14.2913	14.8031	14.4094	14.2913	14.8425	14.3307	13.189	14.8425	13.7795	14.6063		14.9606	15.3543	15.3543		22.0472	17.9134	13.9764
Lan	36.7089	37.5527	47.6793	40.5063	51.8987	52.3207	43.038	52.7426	44.7257	51.0549	56.5401	41.7722	50.6329	57.384	60.3376	58.6498	55.6962	46.8354	40.0844	51.8987	39.6624	62.8692	56.5401	40.5063	63.2911	58.2278	54.0084	56.962	51.4768	56.1181	65.4008	62.8692	59.9156	51.8987		101.266	130.802	130.802		156.118	10.5485	26.5823
Ybn	12.2353	12.7647	14.0588	13.5882	15.2353	12.2353	13.3529	12.5294	13.7647	12.6471	15.7647	13.8235	13.1765	13.8235	13.7059	12.3529	12.5294	11.0588	15.0588	15.2353	10.7647	12.7059	15.5294	15.3529	12.0588	11.6471	13.2353	15	12	12.0588	13.2353	14.3529	11.5882	15.2353		12.9412	11.7647	11.7647		12.7059	17.9412	13.9412
Dy/Dy*	0.85594	0.798856	0.800049	0.888185	0.770936	0.738711	0.769252	0.787461	0.670742	0.76391	0.75525	0.745797	0.722705	0.674539	0.713657	0.745994	0.718773	0.66446	0.696389	0.808153	0.700261	0.735058	0.698422	0.780042	0.71157	0.774617	0.706313	0.63194	0.790192	0.740434	0.609516	0.656422	0.717252	0.657511		0.613842	0.622005	0.622005		0.801926	1.17571	0.821961
Zn/FeT	11.6124	11.4299	11.7053	13.2906	13.3833	12.0319	13.1409	12.8358	10.8908	12.2444	15.0739	13.2379	13.6773	13.2765	12.962	13.267	13.6903	13.7526	13.3861	17.5452	13.2134	12.7989	15.909	14.1611	12.3984	14.2003	14.3499	13.6245	14.2629	13.7567	14.0861	14.669	13.0978	13.7207		14.1115	18.199	18.199		0	0	0
Lapm	12.6638	12.9549	16.4483	13.9738	16.0116	18.0495	14.8472	18.1951	15.4294	17.6128	19.5051	14.4105	17.4672	19.7962	20.8151	20.2329	19.214	16.1572	13.8282	16.7394	13.6827	21.6885	19.5051	13.9738	21.8341	20.0873	18.6317	19.6507	17.7584	19.3595	22.5619	21.6885	20.6696	17.9039		34.9345	45.1237	45.1237		3.63901	122.271	0
Smpm	6.91441	5.99099	7.43243	8.04054	7.5	7.38739	7.47748	8.44595	5.94595	6.86937	9.43694	6.93694	7.04955	6.91441	7.04955	7.79279	7.40991	5.6982	7.09459	8.42342	5.74324	8.64865	8.73874	8.01802	7.63514	7.77027	7.54505	8.04054	7.0045	7.25225	8.06306	7.92793	7.31982	8.08559		10.3604	10.5856	10.5856		5.92342	22.973	0
Eu/Eu*	0.992884	1.11152	0.985558	0.907754	0.913232	0.992098	0.889097	0.994788	1.02999	1.0169	0.870688	0.996619	0.901742	1.02679	1.00389	0.893589	1.08264	1.03947	0.878809	0.920253	1.03893	0.772215	0.887542	0.864411	0.929967	0.922394	0.824435	0.900385	0.851016	0.93942	0.989328	0.92972	0.934129	0.916045		1.13614	0.974678	0.687131	0	1.00984	1.00215	0.997879
Smn	20.0654	17.3856	21.5686	23.3333	21.7647	21.4379	21.6993	24.5098	17.2549	19.9346	27.3856	20.1307	20.4575	20.0654	20.4575	22.6144	21.5033	16.5359	20.5882	24.4444	16.6667	25.098	25.3595	23.268	22.1569	22.549	21.8954	23.3333	20.3268	21.0458	23.3987	23.0065	21.2418	23.4641		18.3007	30.0654	30.719	0	65.3595	17.1895	16.9935
Lan/Smn	0.631125	0.745149	0.762604	0.598877	0.73567	0.841943	0.684222	0.742358	0.894204	0.883528	0.712239	0.715845	0.85383	0.986587	1.01748	0.894692	0.893537	0.977096	0.671657	0.684796	0.820961	0.864151	0.769144	0.600559	0.985431	0.89083	0.850942	0.842171	0.873643	0.919878	0.964236	0.94271	0.97306	0.763037		1.90892	1.50085	1.46892	0	2.38861	0.613659	1.56426
Dyn/Ybn	1.20022	1	1.16496	1.24297	1.1241	1.15517	1.10271	1.22546	0.963894	1.17359	1.11882	1.04808	1.09357	1.04523	1.12602	1.20472	1.13748	1.03598	0.941191	1.17837	1.046	1.20225	1.03943	1.05138	1.18514	1.27098	1.08871	0.952756	1.23688	1.1884	0.9965	1.03411	1.1891	0.958715		1.15605	1.30512	1.30512		1.7352	0.998451	0
					Analytical procedures
					DESCRIPTION INSTRUMENT
C-IR07 Total Carbon (IR Spectroscopy) LECO
S-IR08 Total Sulphur (IR Spectroscopy) LECO
ME-MS81 Lithium Borate Fusion ICP-MS ICP-MS
ME-MS42 Up to 34 elements by ICP-MS ICP-MS
ME-MS61 48 element four acid ICP-MS
ME-ICP06 Whole Rock Package - ICP-AES ICP-AES
TOT-ICP06 Total Calculation for ICP06
OA-GRA05 Loss on Ignition at 1000C WST-SEQ
Signature:
Andrey Tairov, Technical Manager, Ireland
Abbreviations: BA-basaltic andesite; A-andesite; px-pyroxene; am-amphibole
VR-volcanic remnants; VD-volcanic domes; DA-- debris avalanche
Lower, middle, upper Crust after Rudnick and Gao, 2003
Average Carpathian Crust after Mason et al., 1996
OIB, MORB, E-MORB after Sun and Mc Donough, 1989

## Sheet: Supp table S2
Supplementary table S2: Sr and Nd data with 2SD and methodology comments
Sample ID	Lab ID	143Nd/144Nd	2SD	87Sr/86Sr	2SD
775-3B	U11771848	0.512693	6.84076e-06	0.704712	1.11484e-05
775-3B, r.2	U11771848	0.512704	1.07298e-05	0.704718	1.73613e-05
775-6	U11771849	0.512705	4.80442e-06	0.705177	2.93026e-05
776	U11771850	0.512778	1.5342e-06	0.704425	1.67092e-05
782	U11771851	0.512716	7.59146e-06	0.704393	7.2525e-06
790	U11771852	0.512727	3.00724e-06	0.704967	1.5813e-05
795	U11771853	0.512712	1.29519e-05	0.704434	4.44117e-05
807	U11771854	0.512666	9.6564e-07	0.705124	3.15887e-05
809	U11771855	0.512694	1.1298e-05	0.705037	1.46891e-05
819	U11771856	0.512586	6.93028e-06	0.705559	2.36326e-05
823	U11771857	0.512648	6.17397e-07	0.70543	2.24607e-05
827	U11771858	0.512746	4.3299e-06	0.704707	4.00134e-05
829A	U11771859	0.512666	4.32562e-06	0.70466	4.21664e-05
829A, r.2	U11771859	0.512669	4.4888e-06	0.704677	5.60973e-05
Comments
Samples were prepared by alkali fusion digestion
The analysis is carried out by MC-ICP-MS (NEPTUNE Plus, ThermoScientific)
Analysis is carried out after ion exchange separation
SD calculated from two independent consecutive measurements
preparation blank contribution is below 0.05% of Nd content and below 0.1% of Sr content in samples
		Signature
	Ilia Rodushkin
	Associate Professor
	LABORATORY MANAGER
	ALS Scandinavia AB
